# Supplementary material for: Template-free polymorph discrimination and synthesis of calcium carbonate minerals
Source: Royal Society of Chemistry journal article supplement (doi:10.1039/b911219g), 2009-01-01
Supplement: b911219g.pdf [file b911219g.pdf]

Supplementary Information

## Template-free Polymorph Discrimination and Synthesis of Calcium Carbonate Mineral

Jun Jiang, Shao-Feng Chen, Lei Liu, Hong-Bin Yao, Yun-Hao Qiu, Min-Rui Gao,  
Shu-Hong Yu\*

**Characterization of the samples.** X-ray power diffraction (XRD) analyses were carried out on a Philips X'Pert PRO SUPER X-ray diffractometer equipped with graphite monochromatized Cu K $\alpha$  radiation. Field emission scanning electron microscopy (FESEM) was carried out with a field emission scanning electron microanalyzer (JEOL-6700F). Transmission electron microscope (TEM) and high resolution TEM (HRTEM) were performed on JEOL-2010 operated at an acceleration voltage of 200 kV. Fourier transform infrared (FT-IR) spectra were measured on a MAGNA-IR 750 (Nicolet Instrument Co. USA).

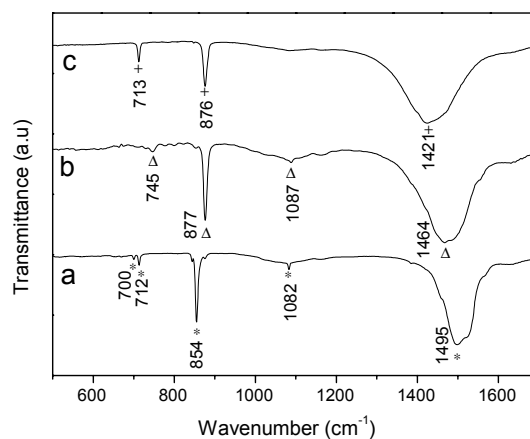

**Figure S1.** FT-IR spectra of CaCO<sub>3</sub> samples obtained by double-jet method at a rate of 1 ml·h<sup>-1</sup>. (a) 50 °C; (b) 25 °C; (c) 0 °C aging 8 hours, after aging 8 hours. [CaCl<sub>2</sub>] = 100 mM, volume = 1.5 mL; [Na<sub>2</sub>CO<sub>3</sub>] = 100 mM, volume = 1.5 mL; 10 mL double-distilled water in the reaction vessel. Note: \*, aragonite phase; Δ, vaterite phase; +, calcite phase.

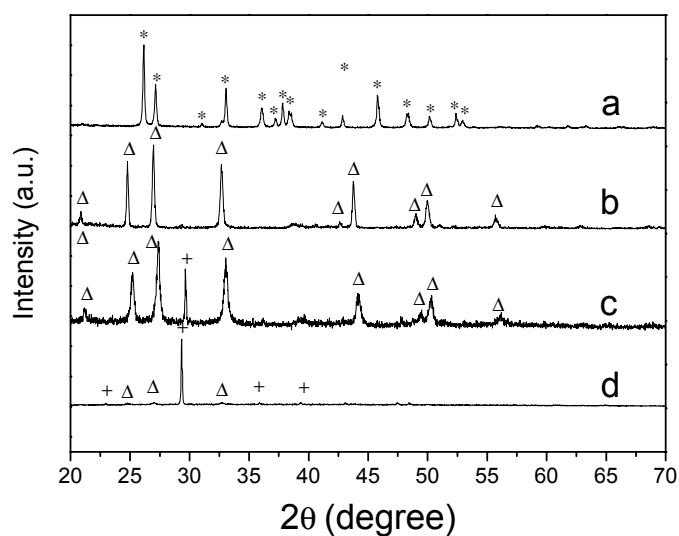

**Figure S2.** XRD patterns of  $\text{CaCO}_3$  samples obtained by double-jet method at a rate of  $0.2 \text{ mL}\cdot\text{min}^{-1}$ . (a)  $50^\circ\text{C}$ , pure aragonite. (b)  $38^\circ\text{C}$ , pure vaterite. (c)  $25^\circ\text{C}$ , a mixture of vaterite and calcite (vaterite is dominant). (d)  $0^\circ\text{C}$ , a mixture of vaterite and calcite (calcite is dominant).  $[\text{CaCl}_2] = [\text{Na}_2\text{CO}_3] = 100 \text{ mM}$ . The volume of each initial solution injected is  $1.5 \text{ mL}$ , adding into  $10 \text{ mL}$  double-distilled water in the reaction vessel.

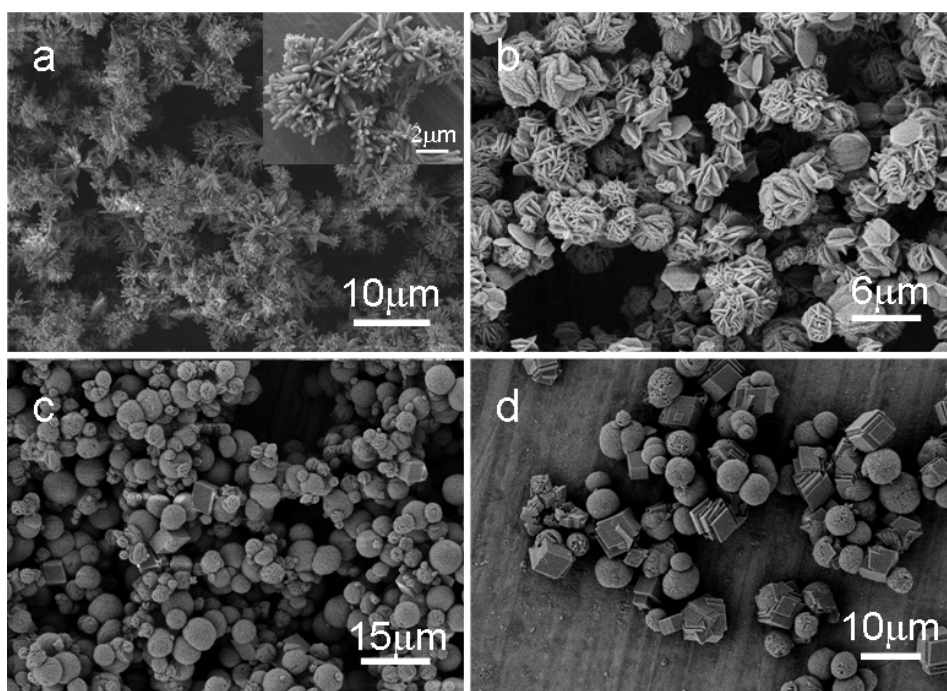

**Figure S3.** Typical SEM images of the  $\text{CaCO}_3$  obtained by double-jet method at a rate of  $0.2 \text{ mL}\cdot\text{min}^{-1}$ . (a)  $50^\circ\text{C}$ , pure aragonite. (b)  $38^\circ\text{C}$ , pure vaterite. (c)  $25^\circ\text{C}$ , a mixture of vaterite and calcite (vaterite is dominant). (d)  $0^\circ\text{C}$ , a mixture of vaterite and calcite (calcite is dominant).  $[\text{CaCl}_2] = [\text{Na}_2\text{CO}_3] = 100 \text{ mM}$ . The volume of each initial solution injected is  $1.5 \text{ mL}$ , adding into  $10 \text{ mL}$  double-distilled water in the reaction vessel.

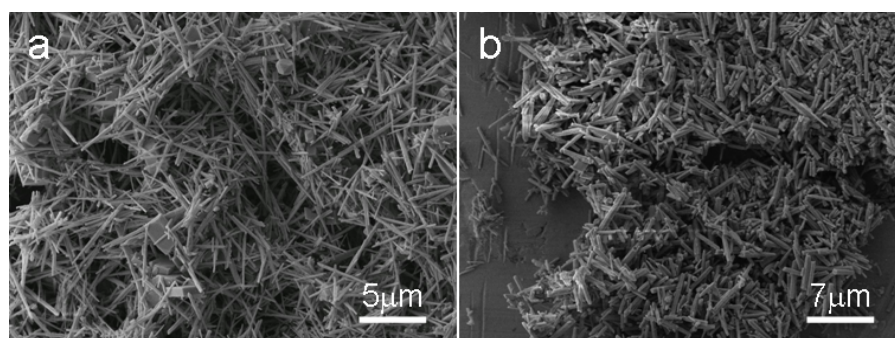

**Figure S4.** SEM images of the CaCO<sub>3</sub> obtained by single-jet method at a rate of 1 ml/h at 50 °C: (a) Na<sub>2</sub>CO<sub>3</sub> ([Na<sub>2</sub>CO<sub>3</sub>] = 100 mM, volume = 1.5 mL) as the single-jet solution, CaCl<sub>2</sub> ([CaCl<sub>2</sub>] = 100 mM, volume = 1.5 mL) is mixed with 10 mL double-distilled water in the reaction vessel; (b) CaCl<sub>2</sub> ([CaCl<sub>2</sub>] = 100 mM, volume = 1.5 mL) as the single-jet solution, Na<sub>2</sub>CO<sub>3</sub> ([Na<sub>2</sub>CO<sub>3</sub>] = 100 mM, volume = 1.5 mL) is mixed with 10 mL double-distilled water in the reaction vessel.

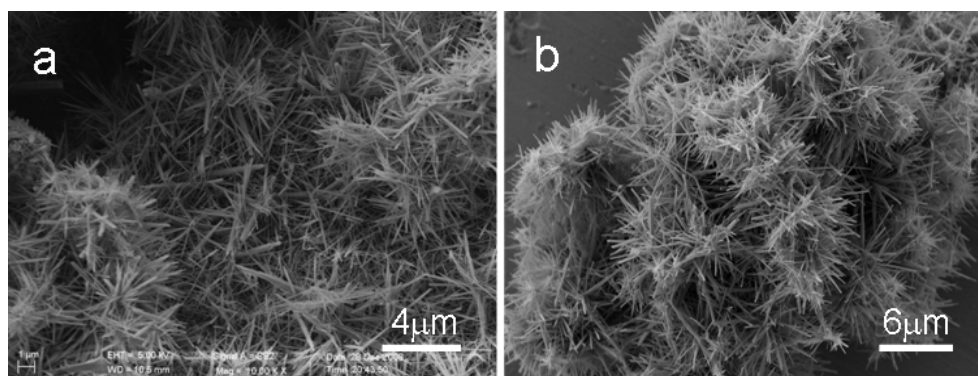

**Figure S5.** SEM images of the CaCO<sub>3</sub> obtained by the double-jet method at a rate of 1 ml/h at 50°C: (a) the sample prepared using 5 mL double-distilled water in the reaction vessel; (b) the sample prepared using 20 ml double-distilled water in the reaction vessel. [CaCl<sub>2</sub>] = 100 mM, volume = 1.5 mL; [Na<sub>2</sub>CO<sub>3</sub>] = 100 mM, volume = 1.5 mL.

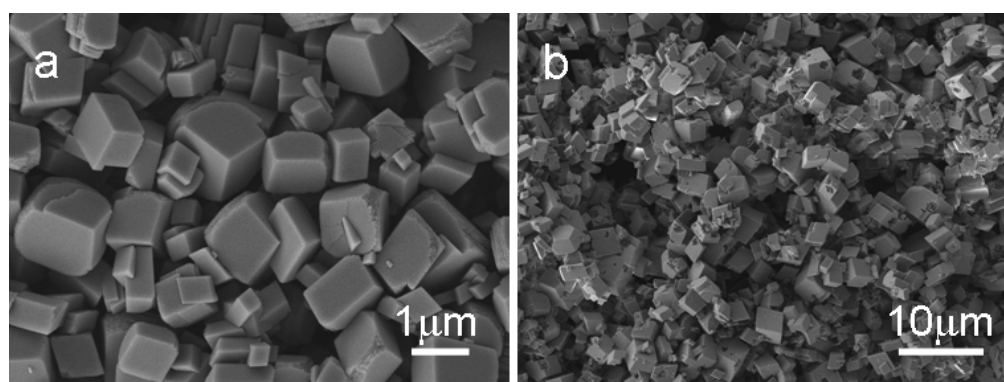

**Figure S6.** SEM images: (a) calcite seeds; (b) pure calcite obtained, 10mL distilled water and calcite seeds (ESI, Fig. S6a†) were put into the reaction vessel (50°C, 1 mL·h<sup>-1</sup>, [CaCl<sub>2</sub>] = 100 mM, volume = 1.5 mL; [Na<sub>2</sub>CO<sub>3</sub>] = 100 mM, volume = 1.5 mL).
